# Supplementary material
Source: PubMed Central journal article supplement (PMC4014186)
Supplement: supp_ddt572_ddt572supp.pdf [file supp_ddt572_ddt572supp.pdf]

**Figure S1**

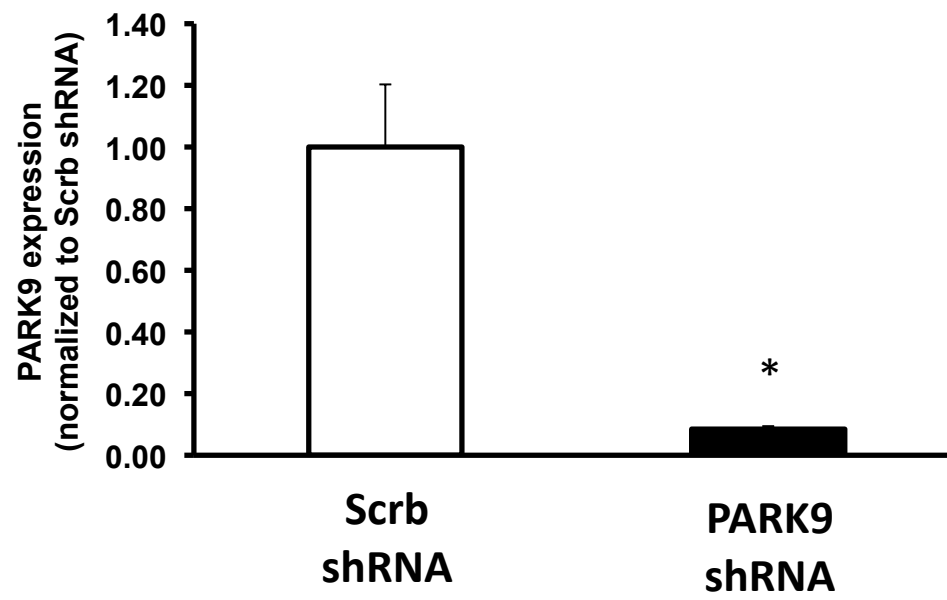

**Figure S2**

**Before treatment**

**Zn 100  $\mu$ M**

**Zn 100  $\mu$ M ; TPEN 1  $\mu$ M**

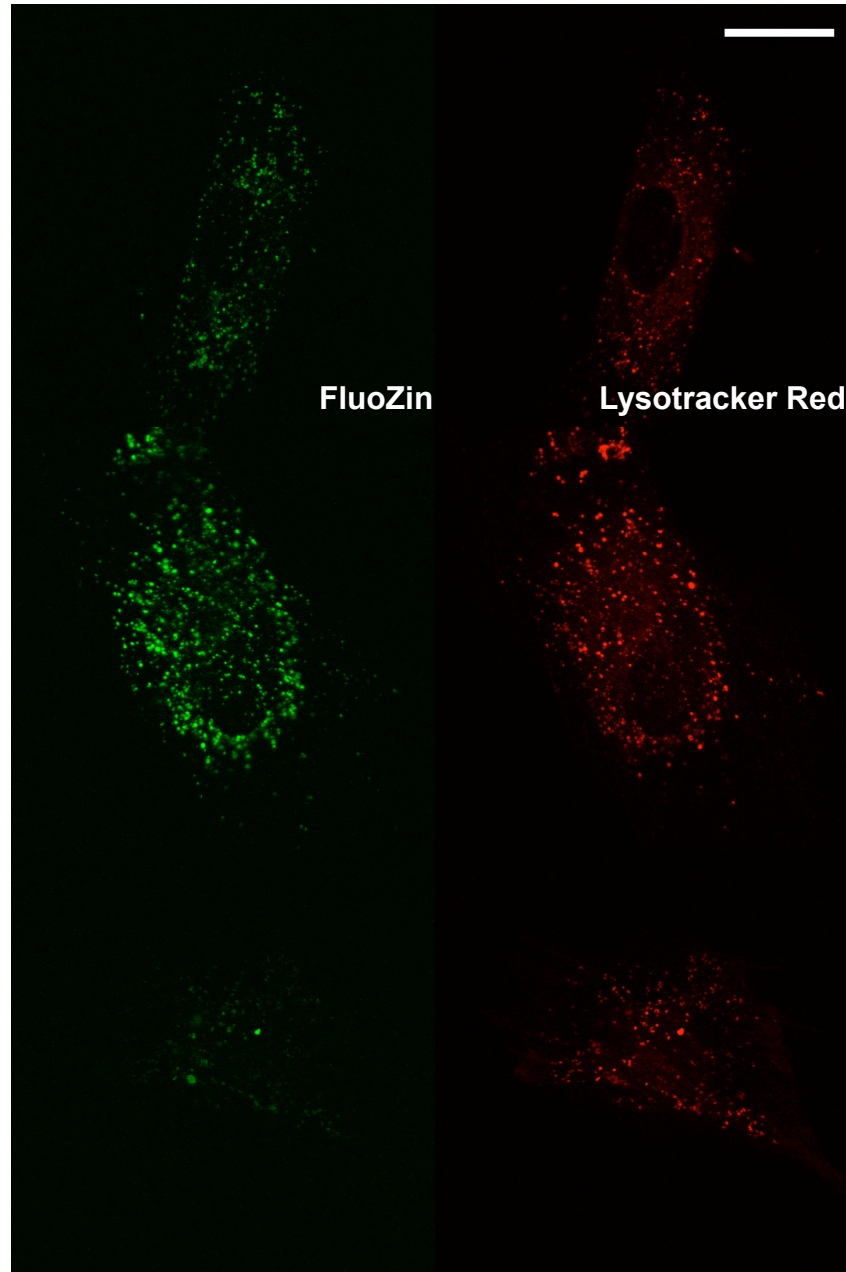

Figure S3

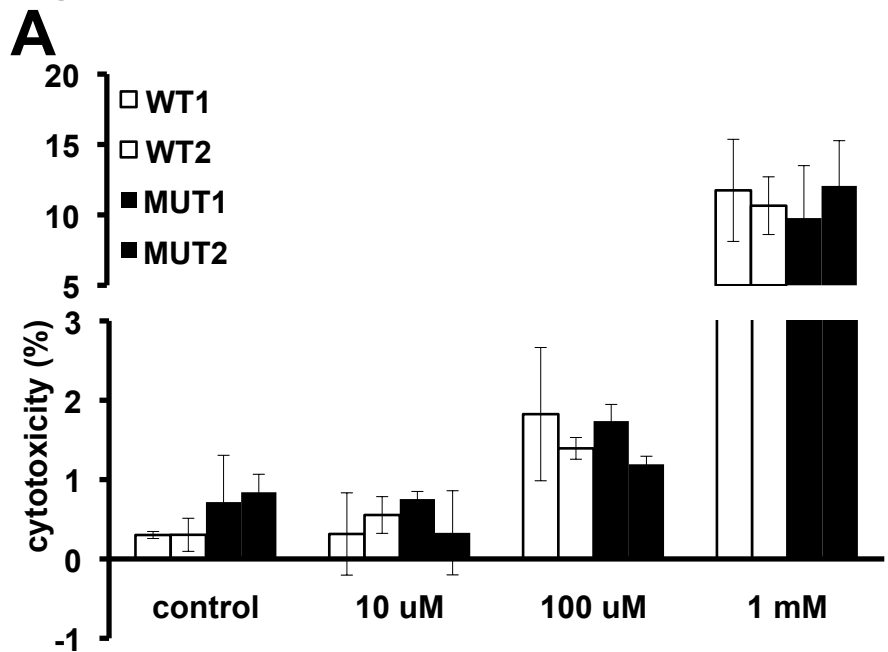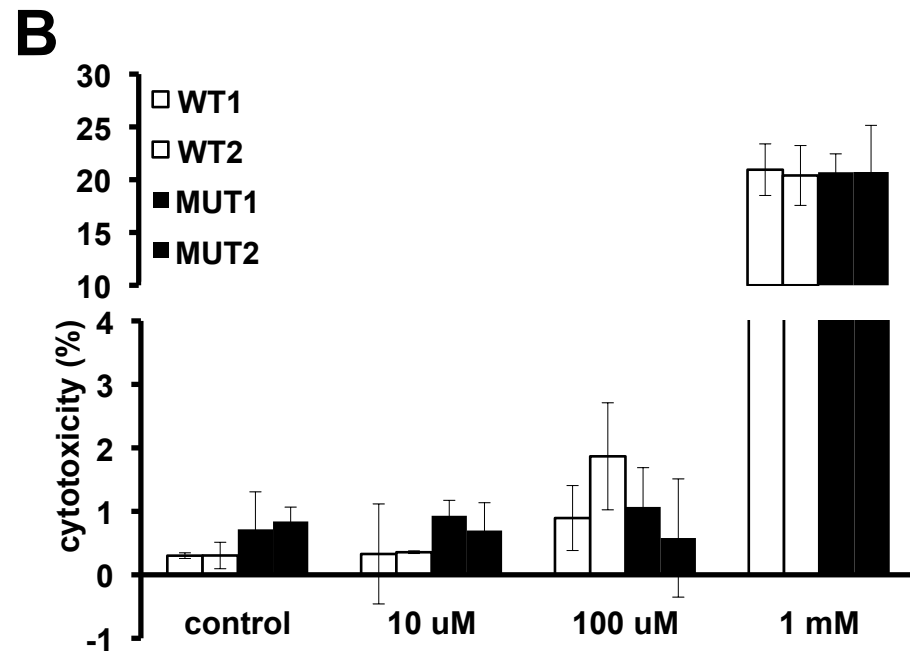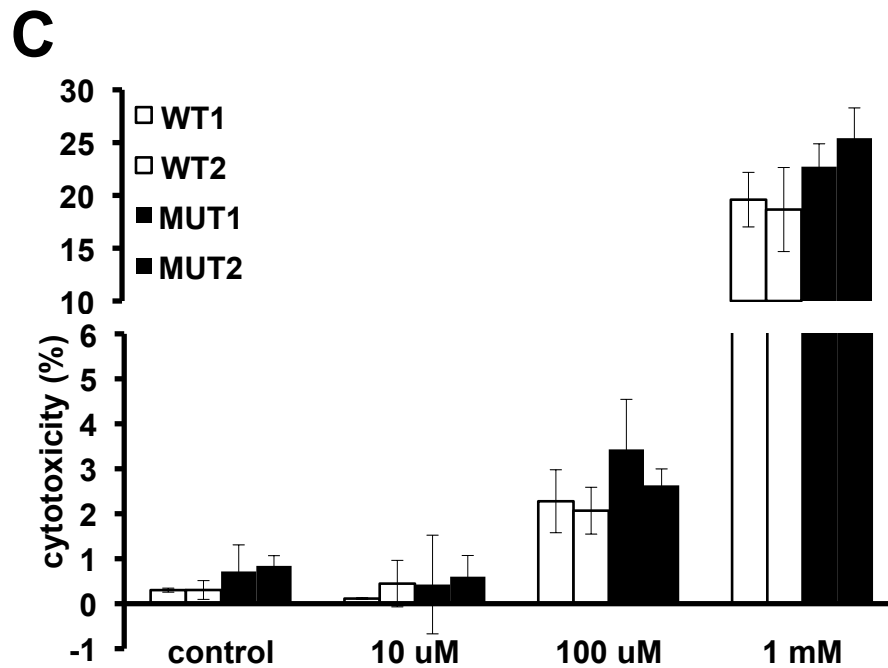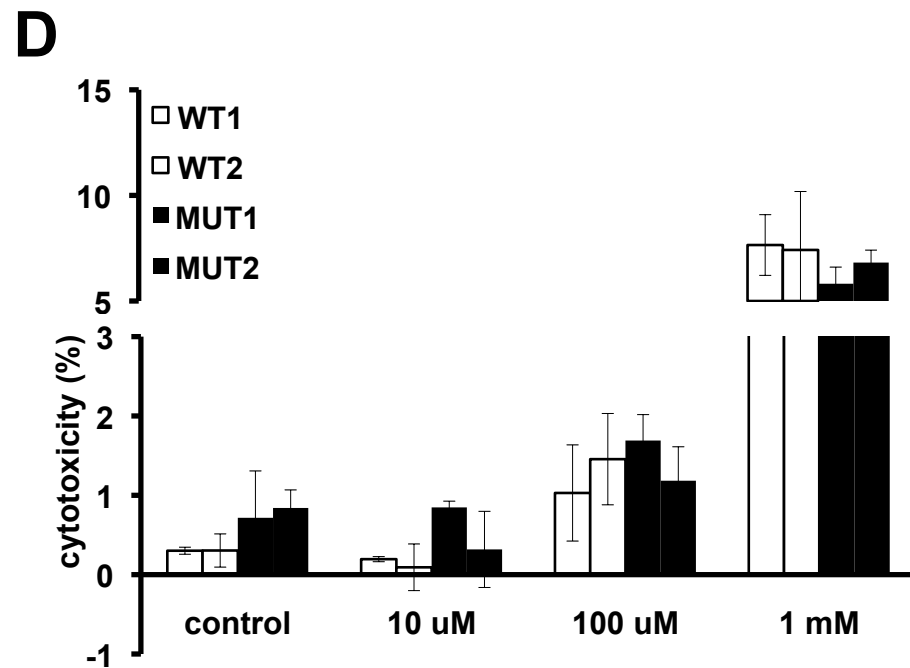

Figure S3

**E**

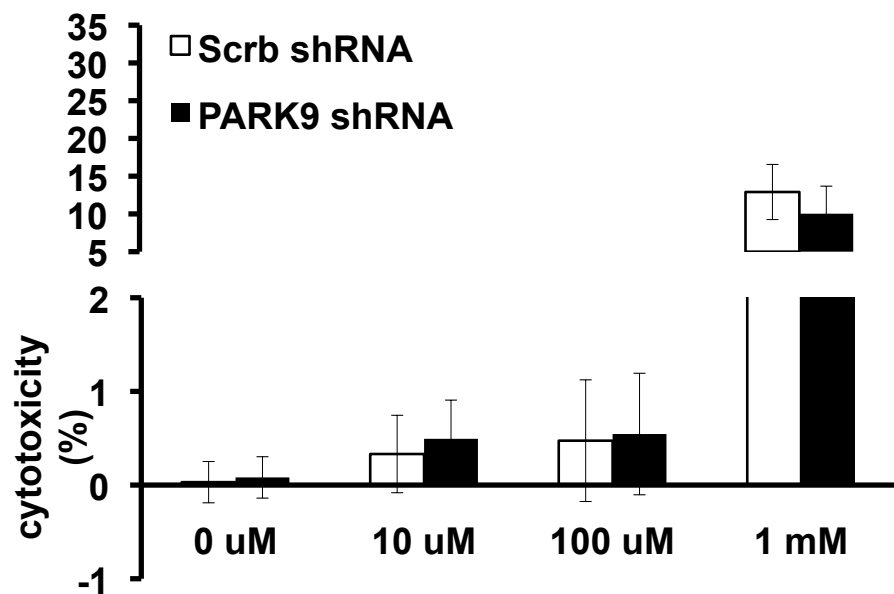

**F**

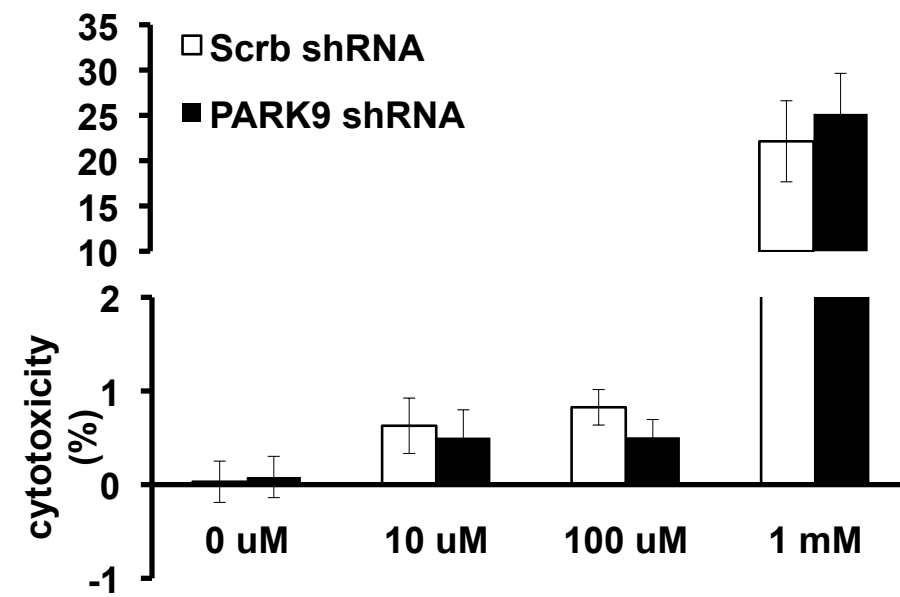

**G**

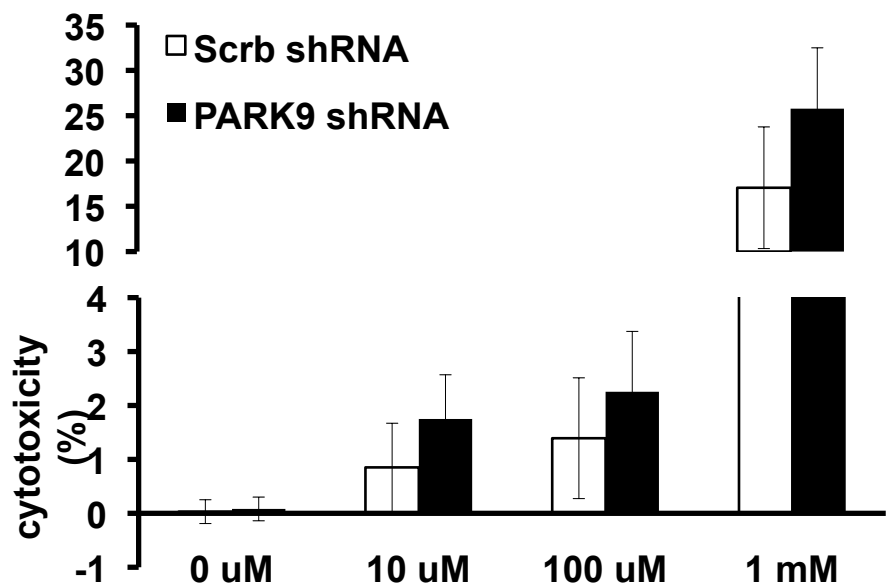

**H**

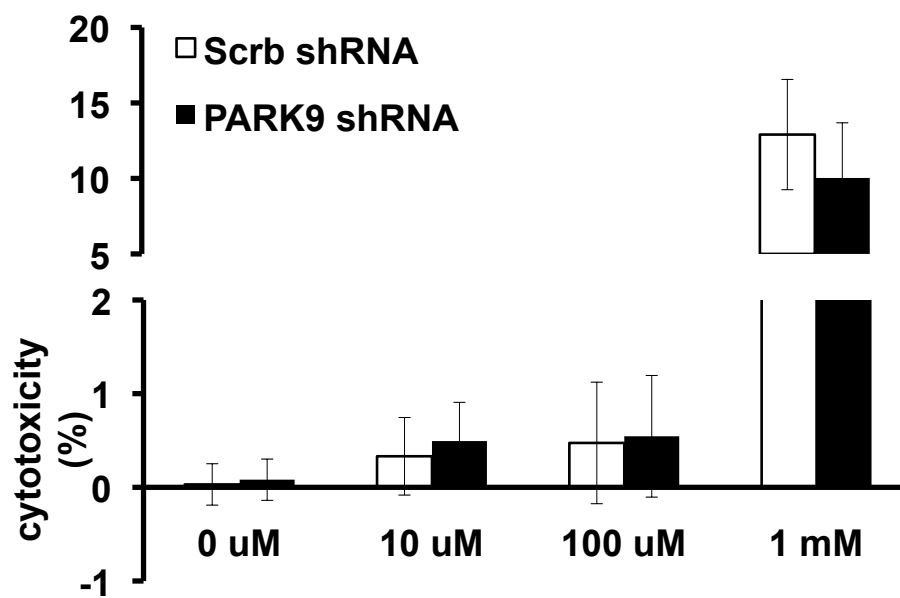

## Supplementary Material Figure legends

### **Figure S1. Efficiency of mouse *PARK9* silencing by *PARK9* shRNA in primary cortical neurons.**

The mRNA expression of mouse *PARK9* was analyzed in the primary cortical neurons transfected with lenti-shRNA targeting mouse *ATP13A2/PARK9* (*PARK9* shRNA) or scrambled control shRNA (Scrb shRNA) (n = 3, \**p* < 0.03). The values are the mean ± SEM.

### **Figure S2. The Zn<sup>2+</sup> chelation of TPEN in fibroblasts**

The representative confocal live-cell images of WT1 fibroblasts stained with FluoZin-3 (green) and LysoTracker Red (red). WT1 fibroblasts were stained before (upper), after treatment with 100 μM Zn<sup>2+</sup> (middle), or after treatment with 100 μM Zn<sup>2+</sup> and 1 μM TPEN (bottom). Scale bar indicates 20 μm.

### **Figure S3. *PARK9* mutant fibroblasts and primary cortical neurons do not show significant difference in sensitivity to cations other than Zn<sup>2+</sup>.**

**A-D.** Lactate dehydrogenase (LDH) release from fibroblasts cultured in a medium containing one of the cations (**A:** Cu<sup>2+</sup>, **B:** Fe<sup>2+</sup>, **C:** Mn<sup>2+</sup>, or **D:** Ni<sup>2+</sup>, with the concentration of 0, 10, 100 or 1000 μM) for 24 hours (n = 3). **E-H.** LDH release from primary cortical neurons (PCNs) cultured in the presence of one of the cations (**E:** Cu<sup>2+</sup>, **F:** Fe<sup>2+</sup>, **G:** Mn<sup>2+</sup>, or **H:** Ni<sup>2+</sup>, with the concentration of 0, 10, 100 or 1000 μM) for 24 hours (n = 3). The values are the mean ± SEM.
